# Supplementary material for: Large-scale production of tungsten trioxide nanoparticles for electrochromic application
Source: Royal Society of Chemistry journal article supplement (doi:10.1039/c3ra47733a), 2014-01-01
Supplement: c3ra47733a.pdf [file c3ra47733a.pdf]

## Electronic Supplementary Material

# Large-scale production of tungsten trioxide nanoparticles for electrochromic application

Xueting Chang <sup>a</sup>, Shibin Sun <sup>b, c\*</sup>, Lihua Dong <sup>a\*</sup>, Yaohua Dong <sup>a</sup>, Yansheng Yin <sup>a</sup>

<sup>a</sup> *Institute of Marine Materials Science and Engineering, College of Marine Science and Engineering, Shanghai Maritime University, Shanghai 200135, People's Republic of China*

<sup>b</sup> *College of Logistics Engineering, Shanghai Maritime University, Shanghai 200135, People's Republic of China*

<sup>c</sup> *College of Electromechanical Engineering, Qingdao University of Science and Technology, Qingdao 266061, People's Republic of China*

### Supporting Figures

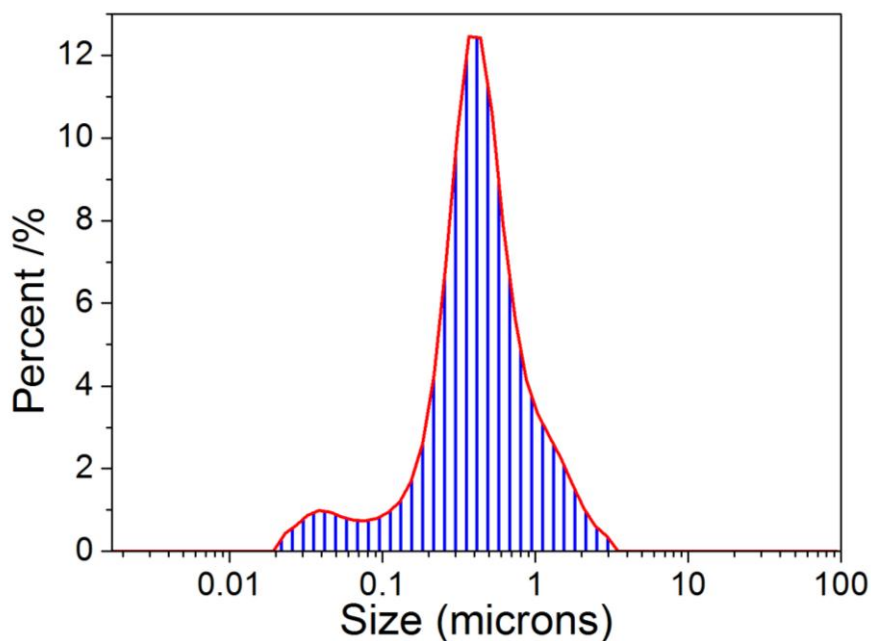

Fig. S1 Size distribution curve of WO<sub>3</sub> particles from zone B, synthesized at 1300 °C with an Ar gas flow rate of 2 L/min.

\*Corresponding author. Tel/Fax: +86 021 3828 2611.  
E-mail: sunshibin@yahoo.com; lhdong@shmtu.edu.cn.

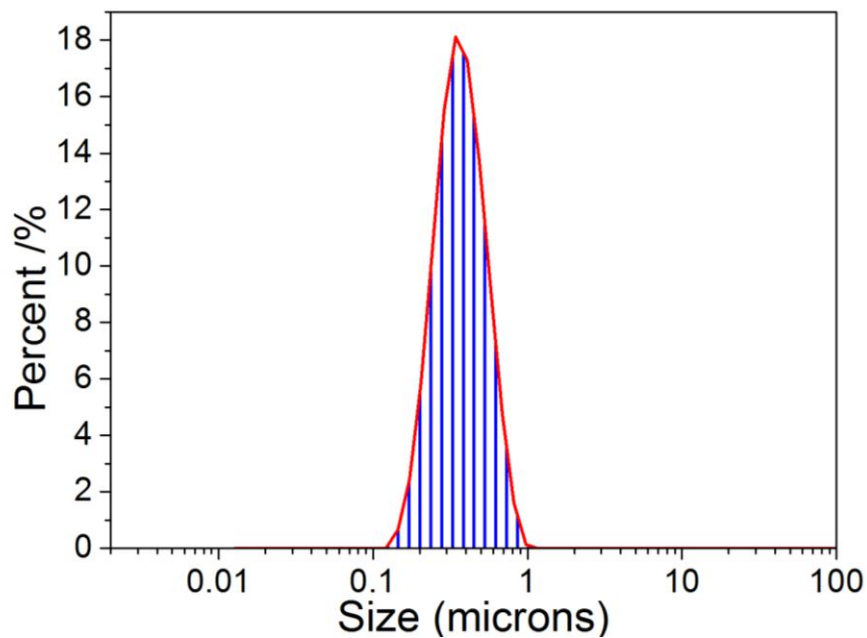

Fig. S2 Size distribution curve of  $\text{WO}_3$  particles from zone B, synthesized at 1350 °C with an Ar gas flow rate of 2 L/min.

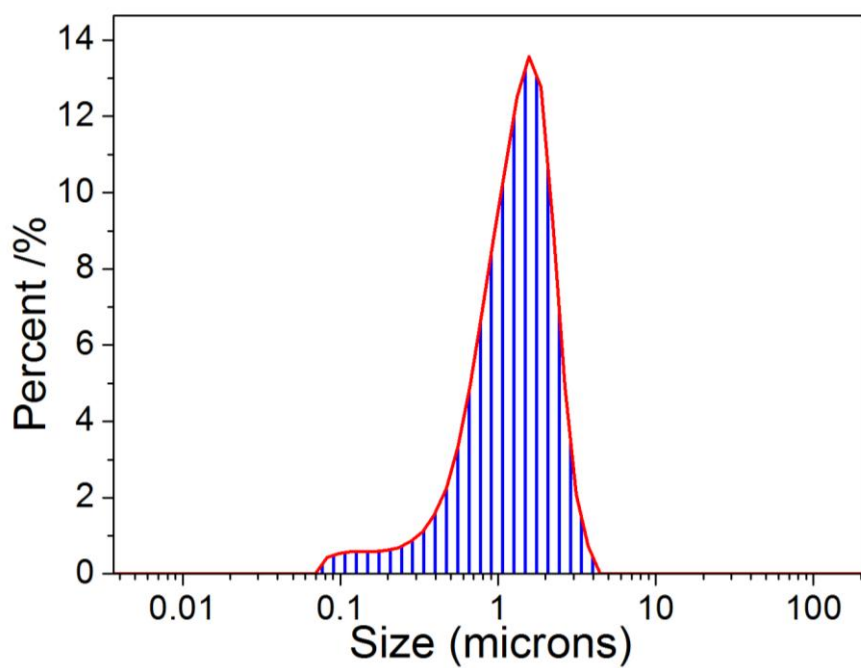

Fig. S3 Size distribution curve of the octahedral  $\text{WO}_3$  particles from zone B, synthesized at 1400 °C with an Ar gas flow rate of 2 L/min.

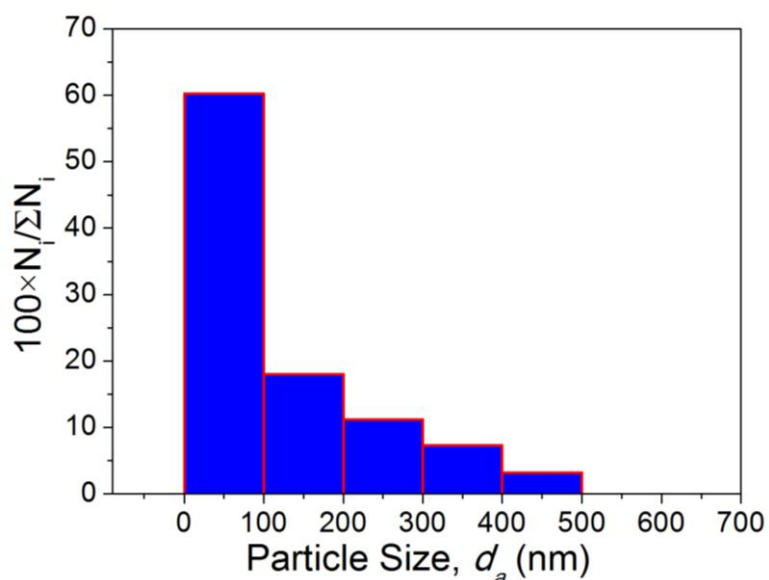

Figure S4 Size distribution curve of  $\text{WO}_3$  particles from zone B, synthesized at 1350 °C with an Ar gas flow rate of 4 L/min.

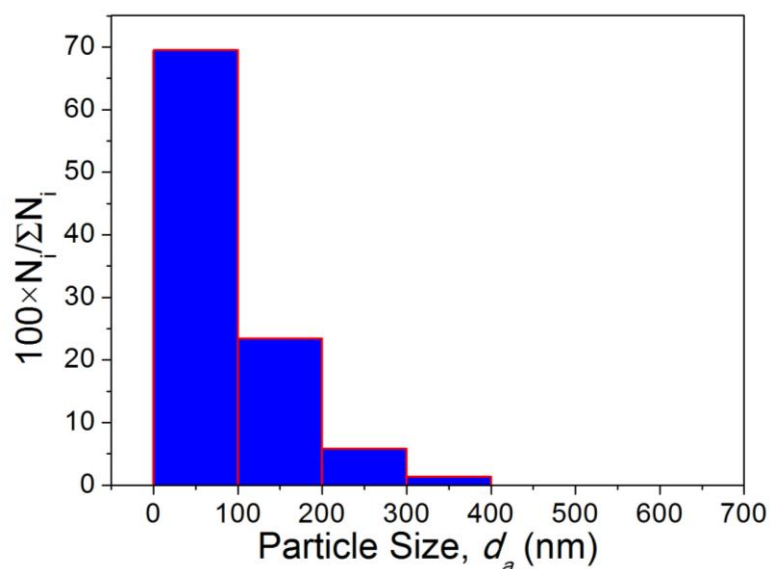

Fig. S5 Size distribution curve of  $\text{WO}_3$  particles from zone C, synthesized at 1350 °C with an Ar gas flow rate of 6 L/min.

The size distribution curves in Figs. 45 and S5 here were obtained on the basis of the SEM images (Fig.5 in the manuscript) by using the **Image J** software. The average diameters ( $d_a$ ) of the particles were calculated using the equation  $\log d_a = \sum n \log d / \sum n$ , where  $d$  corresponds to the diameter of approximately 1000 randomly sampled particles in the SEM image. Here, the average sizes of the particles from zone B and zone C were calculated to be 68 and 60 nm, respectively.

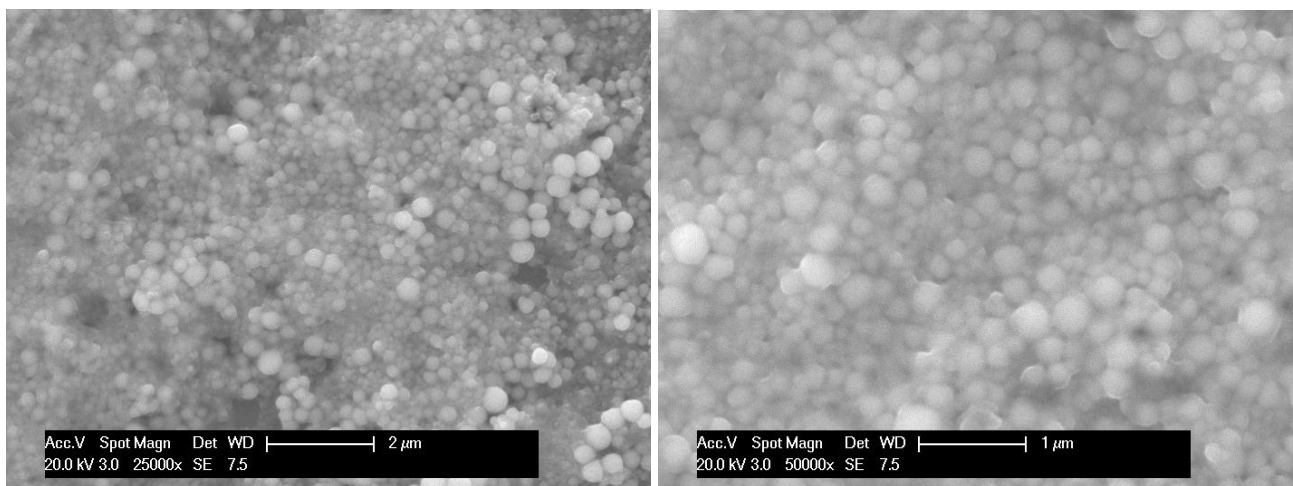

Fig. S6 SEM images of  $\text{WO}_3\text{-S}$  film

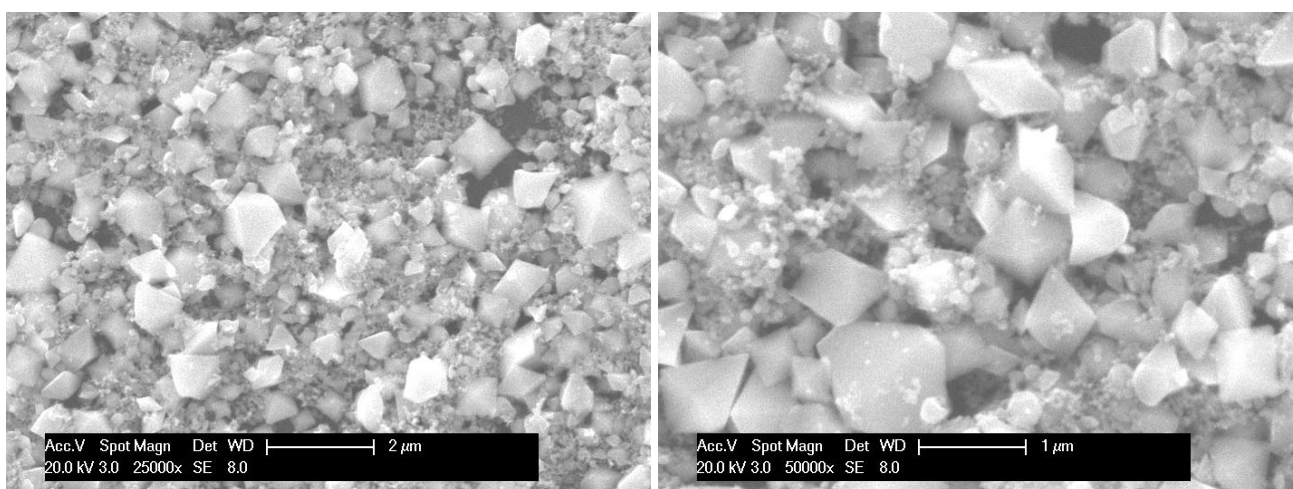

Fig. S7 SEM images of  $\text{WO}_3\text{-O}$  film
